# Supplementary material for: Volume uptake of carbonyls during diffusional ice crystal growth
Source: Copernicus journal article supplement (doi:10.5194/acp-25-18249-2025), 2025-12-12
Supplement: Supplementary file 1 [file acp-25-18249-2025-supplement.pdf]

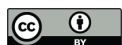

*Supplement of*

## **Volume uptake of carbonyls during diffusional ice crystal growth**

**Jackson Seymore et al.**

*Correspondence to:* Jackson Seymore ([seymorej@uni-mainz.de](mailto:seymorej@uni-mainz.de))

The copyright of individual parts of the supplement might differ from the article licence.

Equation S1. Sonntag Parameterization

$$\log e_i = -6024.5282 / T \quad (S1)$$

$$+ 24.721994$$

$$+ 1.0613868 \cdot 10^{-2} \cdot T$$

$$- 1.3198825 \cdot 10^{-5} \cdot T^2$$

$$- 0.49382577 \cdot \log T$$

where the air temperature (T) is in units of K and saturation pressure of water vapor over ice ( $e_i$ ) is in units of hPa.

Table S1. Bubbler Concentrations and Henry Solubilities

|                        | $H^{\text{cp}}$            |         | $H_s^{\text{cp}}T$ | Target<br>Flowtube Gas<br>Concentration | Molar<br>Mass | Target Bubbler Liquid<br>concentration (uM) |                    |                    |
|------------------------|----------------------------|---------|--------------------|-----------------------------------------|---------------|---------------------------------------------|--------------------|--------------------|
|                        | mol/(m <sup>3</sup><br>Pa) | M/atm   |                    |                                         |               | -40 °C<br>(d = 165)                         | -30 °C<br>(d = 55) | -20 °C<br>(d = 18) |
| <b>Benzaldehyde</b>    | 0.4                        | 40.53   | 5200               | 10                                      | 106.12        | 109                                         | 36                 | 12                 |
| <b>MVK</b>             | 0.26                       | 26.34   | 7800               | 10                                      | 70.09         | 91                                          | 30                 | 10                 |
| <b>Methacrolein</b>    | 0.045                      | 4.56    | 4600               | 10                                      | 70.09         | 12                                          | 4                  | 1                  |
| <b>Acetaldehyde</b>    | 0.13                       | 13.17   | 5900               | 10                                      | 44.05         | 38                                          | 13                 | 4                  |
| <b>Formaldehyde</b>    | 32                         | 3242.4  | 7100               | 10                                      | 30.03         | 10447                                       | 3482               | 1159               |
| <b>Acetone</b>         | 0.27                       | 27.36   | 5500               | 10                                      | 58.08         | 76                                          | 25                 | 8                  |
| <b>Nopinone</b>        | 14                         | 1418.55 |                    | 10                                      | 138.21        | 2341                                        | 780                | 260                |
| <b>Norcamphor</b>      | 0.43                       | 43.57   | 5100               | 10                                      | 110.15        | 116                                         | 39                 | 13                 |
| <b>Camphor</b>         | 0.54                       | 54.72   | 4800               | 10                                      | 152.23        | 142                                         | 47                 | 16                 |
| <b>Diacetyl</b>        | 0.73                       | 73.97   | 5700               | 10                                      | 86.09         | 209                                         | 70                 | 23                 |
| <b>Glyoxal</b>         | 4100                       | 415433  | 7500               | 10                                      | 58.04         | 1389975                                     | 463325             | 154161             |
| <b>Hydroxyacetone</b>  | 77                         | 7802.03 |                    | 10                                      | 74.08         | 12873                                       | 4291               | 1428               |
| <b>Methylglyoxal</b>   | 35                         | 3546.38 | 7500               | 10                                      | 72.06         | 11866                                       | 3955               | 1316               |
| <b>Propionaldehyde</b> | 0.099                      | 10.03   | 4300               | 10                                      | 58.08         | 25                                          | 8                  | 3                  |

Table S2. Target m/z for MS analysis (Compounds given in elution order)

| Species         | Elemental Formula | Monoisotopic Mass (Da) | MS Analyte             | Analyte Elemental Formula | Target m/z used [M-H] <sup>-</sup> | Expected RT (min) |
|-----------------|-------------------|------------------------|------------------------|---------------------------|------------------------------------|-------------------|
| Hydroxyacetone  | C3H6O2            | 74.0368                | Hydroxyacetone-DNPH    | C9H10N4O5                 | 253.0573                           | 1.3               |
| Formaldehyde    | CH2O              | 30.0106                | Formaldehyde-DNPH      | C7H6N4O4                  | 209.0311                           | 1.9               |
| Acetaldehyde    | C2H4O             | 44.0262                | Acetaldehyde-DNPH      | C8H8N4O4                  | 223.0467                           | 2.7               |
| Acetone         | C3H6O             | 58.0419                | Acetone-DNPH           | C9H10N4O4                 | 237.0624                           | 3.5               |
| Propionaldehyde | C3H6O             | 58.0419                | Propionaldehyde-DNPH   | C9H10N4O4                 | 237.0624                           | 3.9               |
| Methacrolein    | C4H6O             | 70.0419                | Methacrolein-DNPH      | C10H10N4O4                | 249.0624                           | 4.5               |
| MVK             | C4H6O             | 70.0419                | MVK-DNPH               | C10H10N4O4                | 249.0624                           | 4.8               |
| Benzaldehyde    | C7H6O             | 106.0419               | Benzaldehyde-DNPH      | C13H10N4O4                | 285.0624                           | 5.4               |
| Glyoxal         | C2H2O2            | 58.0055                | Glyoxal-bis-DNPH       | C14H10N8O8                | 417.0534                           | 5.7               |
| Norcamphor      | C7H10O            | 110.0732               | Norcamphor-DNPH        | C13H14N4O4                | 289.0937                           | 5.7               |
| Methylglyoxal   | C3H4O2            | 72.0211                | Methylglyoxal-bis-DNPH | C15H12N8O8                | 431.0700                           | 6.5               |
| Diacetyl        | C4H6O2            | 86.0368                | Diacetyl-bis-DNPH      | C16H14N8O8                | 445.0856                           | 7.2               |
| Nopinone        | C9H14O            | 138.1045               | Nopinone-DNPH          | C15H18N4O4                | 317.1250                           | 7.8               |
| Camphor         | C10H16O           | 152.1201               | Camphor-DNPH           | C16H20N4O4                | 331.1412                           | 8.2               |

Table S3. Ice uptake Coefficients converted to mol m<sup>-3</sup> Pa<sup>-1</sup>

|                | <i>K</i> at -20 °C               | <i>K</i> at -30 °C               | <i>K</i> at -40 °C               |
|----------------|----------------------------------|----------------------------------|----------------------------------|
| MVK            | $(1.05 \pm 0.59) \times 10^{-5}$ | $(1.02 \pm 1.03) \times 10^{-6}$ | $(4.65 \pm 4.26) \times 10^{-6}$ |
| Acetaldehyde   | $(6.02 \pm 1.67) \times 10^{-5}$ | $(4.82 \pm 6.79) \times 10^{-4}$ | $(1.60 \pm 0.84) \times 10^{-3}$ |
| Acetone        | $(8.88 \pm 2.55) \times 10^{-5}$ | $(1.45 \pm 1.90) \times 10^{-4}$ | $(1.11 \pm 1.22) \times 10^{-3}$ |
| Benzaldehyde   | $(3.65 \pm 1.36) \times 10^{-8}$ | $(3.28 \pm 2.46) \times 10^{-7}$ | $(7.38 \pm 5.87) \times 10^{-6}$ |
| Camphor        | $(2.41 \pm 0.33) \times 10^{-7}$ | $(3.46 \pm 3.79) \times 10^{-6}$ | $(3.08 \pm 2.19) \times 10^{-5}$ |
| Diacetyl       | $(1.75 \pm 0.54) \times 10^{-6}$ | $(1.57 \pm 1.45) \times 10^{-5}$ | $(6.86 \pm 5.70) \times 10^{-4}$ |
| Formaldehyde   | $(9.96 \pm 2.93) \times 10^{-5}$ | $(6.83 \pm 9.78) \times 10^{-3}$ | $(5.33 \pm 3.26) \times 10^{-2}$ |
| Glyoxal        | $(4.28 \pm 0.58) \times 10^{-6}$ | $(3.35 \pm 1.21) \times 10^{-5}$ | $(5.39 \pm 7.96) \times 10^{-4}$ |
| Hydroxyacetone | $(7.77 \pm 1.08) \times 10^{-7}$ | $(1.16 \pm 1.55) \times 10^{-5}$ | $(1.83 \pm 2.39) \times 10^{-4}$ |

|                 |                                  |                                  |                                  |
|-----------------|----------------------------------|----------------------------------|----------------------------------|
| Methacrolein    | $(1.87 \pm 0.90) \times 10^{-6}$ | $(5.69 \pm 7.06) \times 10^{-6}$ | $(1.09 \pm 1.58) \times 10^{-4}$ |
| Methylglyoxal   | $(3.47 \pm 1.42) \times 10^{-6}$ | $(2.77 \pm 1.81) \times 10^{-5}$ | $(2.04 \pm 1.75) \times 10^{-4}$ |
| Nopinone        | $(4.41 \pm 1.14) \times 10^{-9}$ | $(5.44 \pm 3.30) \times 10^{-8}$ | $(0.85 \pm 1.26) \times 10^{-6}$ |
| Norcamphor      | $(2.05 \pm 0.98) \times 10^{-8}$ | $(4.48 \pm 1.35) \times 10^{-8}$ | $(3.17 \pm 3.91) \times 10^{-6}$ |
| Propionaldehyde | $(6.54 \pm 5.94) \times 10^{-5}$ | $(1.04 \pm 1.14) \times 10^{-4}$ | $(1.51 \pm 1.66) \times 10^{-3}$ |

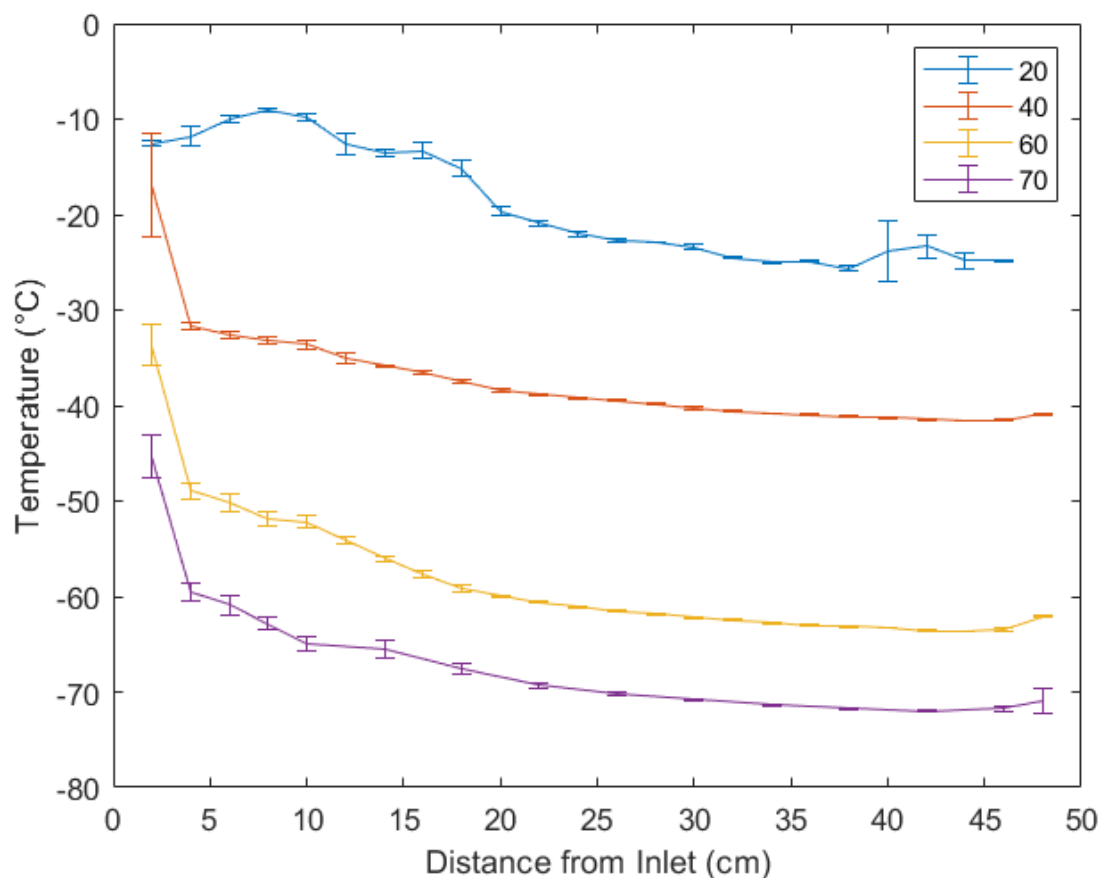

Figure S1. Temperature Profile along z-axis of Flowtube

## Section S1. Discussion on Entropy-Enthalpy Compensation

Reviewing this data in accordance with the definitions laid out by Liu and Guo, (2001) and Pan et al. (2015), it appears unlikely that the Entropy-Enthalpy Compensation (EEC) effect seen here is a spurious finding. The linearity from the regressions in Table 3 are strong and thus there is relatively low standard error in  $\Delta H$  and  $\Delta S$ , especially comparing to the significant range of  $\Delta H$  and  $\Delta S$  values ( $-145$  to

21 kJ mol<sup>-1</sup>, -621 to 44 J mol<sup>-1</sup> K<sup>-1</sup> respectively). The lack of strong convergence to an isoequilibrium when extrapolating from Figure 2 (also more clearly demonstrated in Figure S2) shows that this system however does not readily appear to meet the definitions to be an isokinetic relation (IKR).

This correlation between  $\Delta S$  and  $\Delta H$  can further be explored under the constraints that Sharp (2001) places on EEC for 95% confidence. The range of  $\Delta G$  in this experiment is from -9 to 24.4 kJ mol<sup>-1</sup> while the range of temperatures experiments were run was between -20 and -40 °C, (the harmonic mean being -30.3 °C or 242.9 K). While  $|\Delta G| < |\Delta H|$  for most cases here, there is a significant range of  $|\Delta G|$  and in the same magnitude as  $|\Delta H|$  such that  $\Delta G$  cannot be considered constant. The compensation temperature (235.5 K) however does fall within the 2 $\sigma$  range of the experimental temperature (242.9 K) and so this analysis alone does not meet the 95% confidence interval for nontrivial correlation. But, if the data from Fries et al. (2007) is included in this analysis,  $T_c$  and  $r^2$  are instead 225.9 K and 0.9788 respectively with the harmonic mean experimental temperature as 244.9 K; this places  $T_c$  outside of the 2 $\sigma$  range of the experimental temperature and thus meets Sharp's criteria for a nontrivial correlation.

In regards to IKR as viewed through the Griessen et al. (2020) and Griessen and Dam (2021) EEC analysis, the Compensation Quality Factor (CQF) values are rather low, both below 0.25. This supports the observation of the absence of strong coalescence to an isoequilibrium and no noticeable IKR. The increase in CQF when including the data from Fries et al. (2007) also indicates that with the inclusion of more data, coalescence could be statistically inferred.

It should be noted that the explanation of EEC from solvation effects is not specific to aqueous systems. Computational work has identified instead two causes for EEC in solvent-solute interactions: solvent reorganization and molar shift (Grunwald and Steel, 1995). Regardless of aqueous nonspecificity, the EEC's implication of a surface liquid layer can still be made. There are other less likely potential explanations currently in literature such as the influence of hidden Carnot cycles from microphase transitions (Starikov and Nordén, 2007) or the loss of translational and rotational entropy during gas

phase association (Ryde, 2014). However, these seem unlikely to be the dominant mechanism for the EEC seen here and are outside the scope of discussion here.

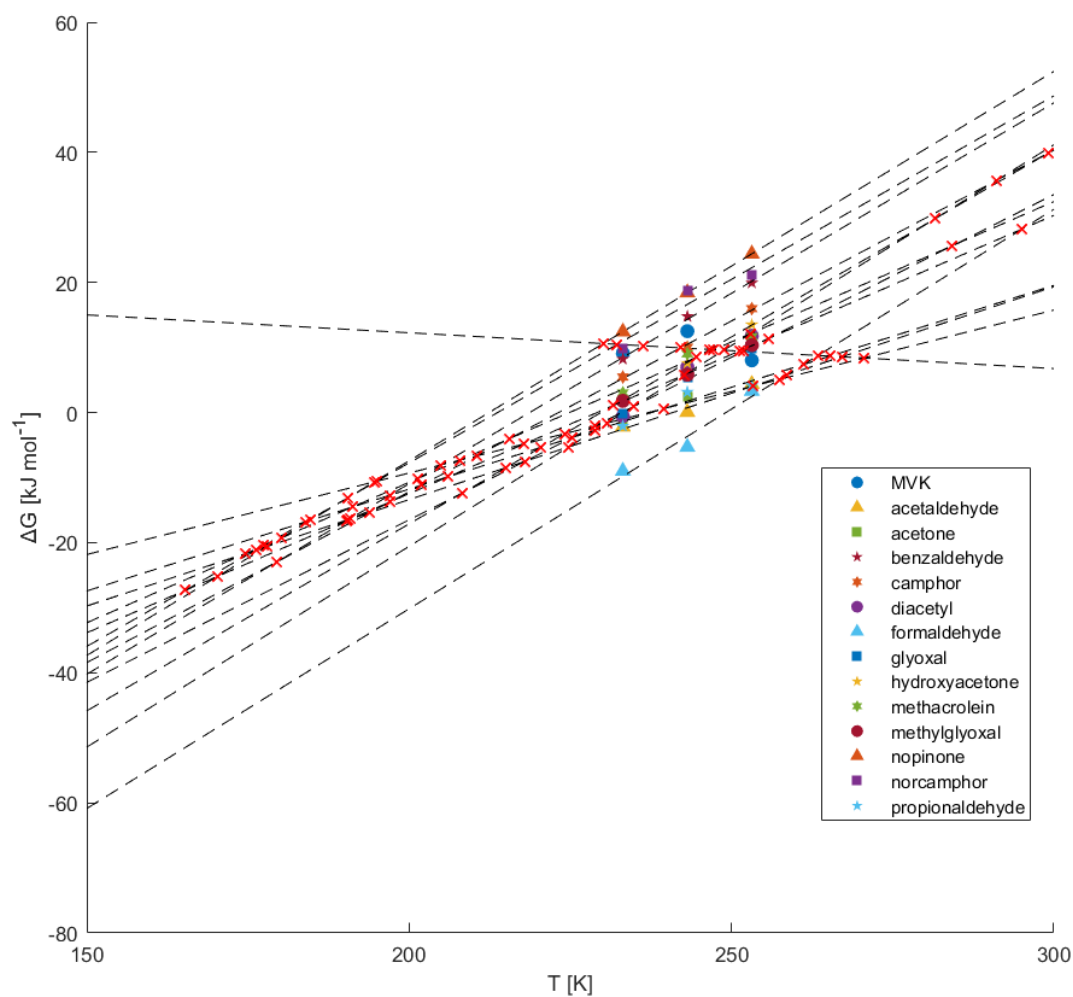

Figure S2. Plot of Temperature versus  $\Delta G$ . Red x's indicate intersections of the extrapolated linear regressions.

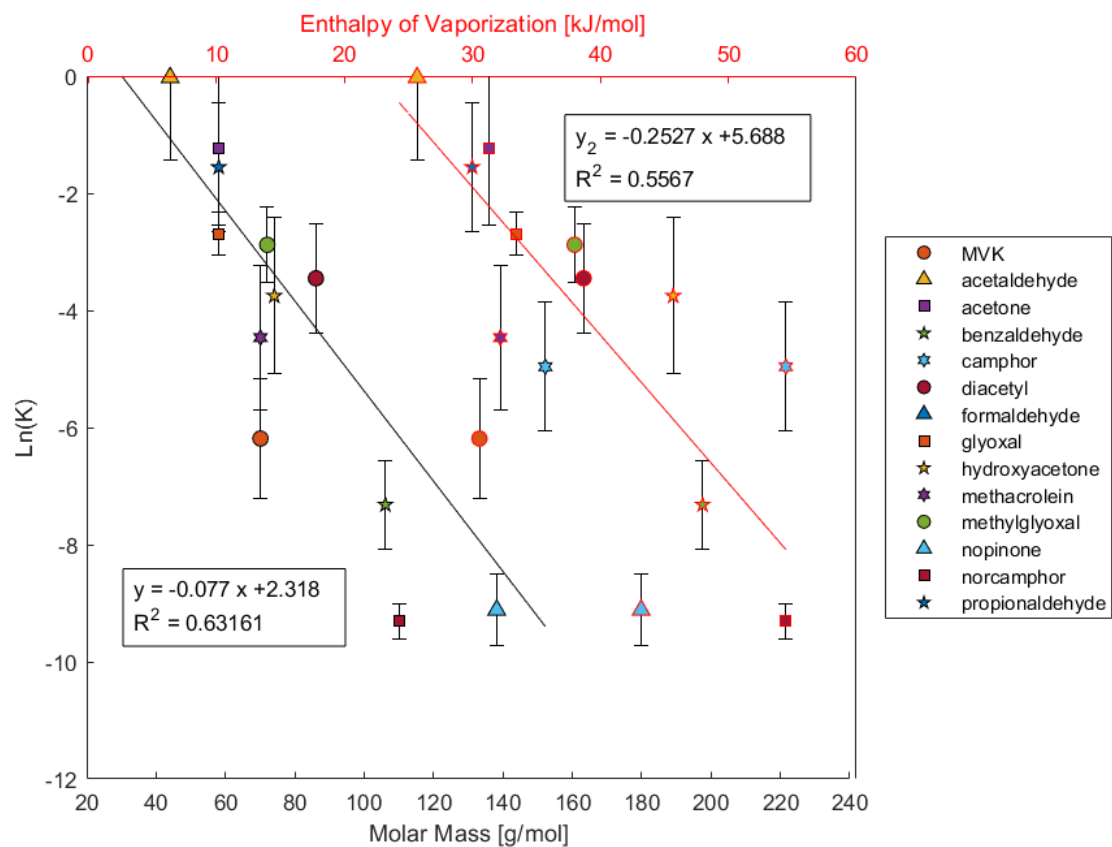

Figure S3. Scatterplot of  $\ln(K)$  at  $-30\text{ }^{\circ}\text{C}$  versus the heat of vaporization (red line) and molar mass (black line).

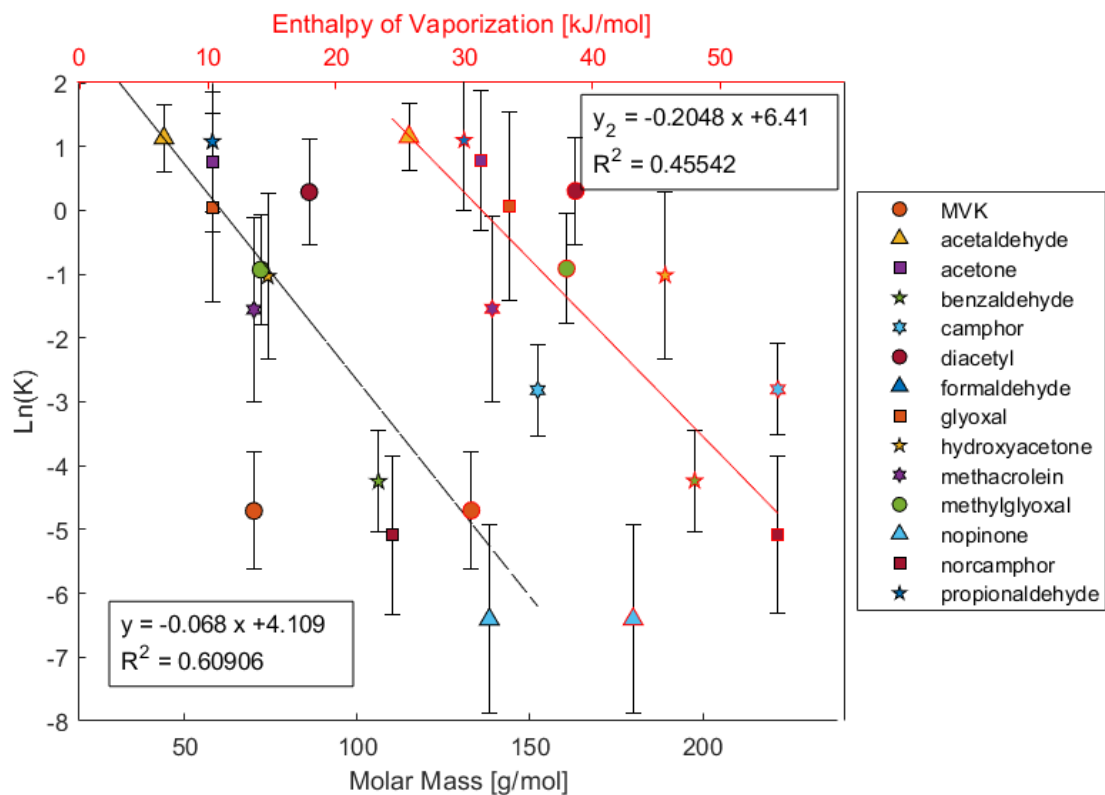

Figure S4. Scatterplot of  $\ln(K)$  at  $-40\text{ }^{\circ}\text{C}$  versus the heat of vaporization (red line) and molar mass (black line).

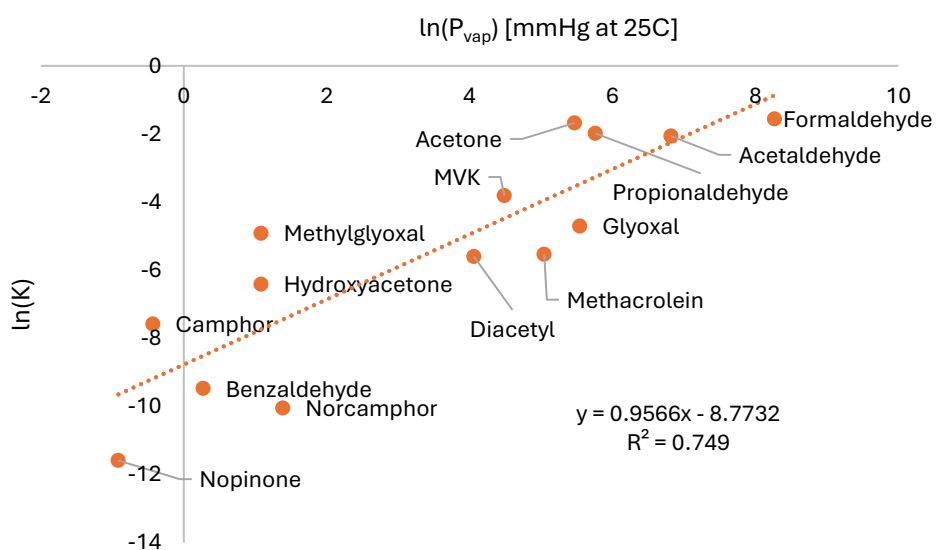



Figure S5. Scatterplot of  $\ln(K)$  at  $-20\text{ }^{\circ}\text{C}$  versus the natural log of vapor pressure at  $25\text{ }^{\circ}\text{C}$ .

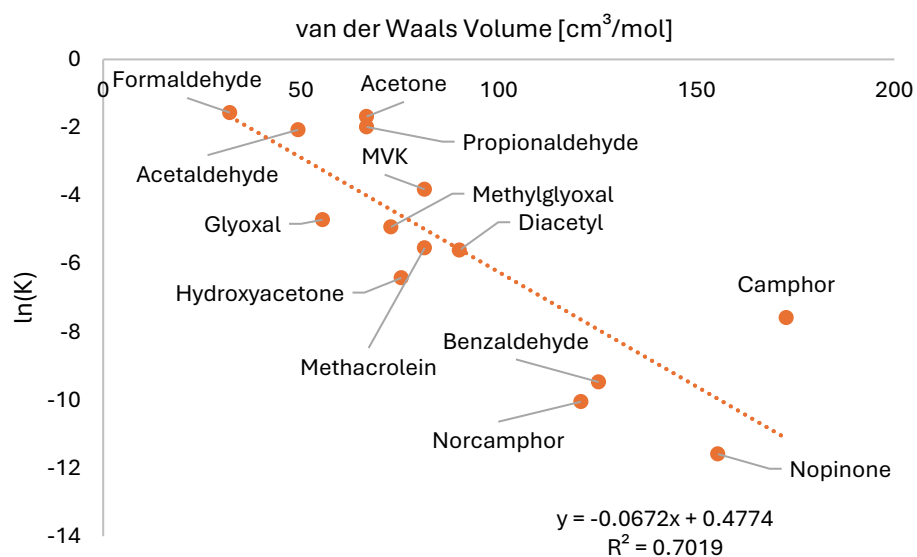

Figure S6. Scatterplot of  $\ln(K)$  at  $-20\text{ }^{\circ}\text{C}$  versus the calculated van der Waals volume.

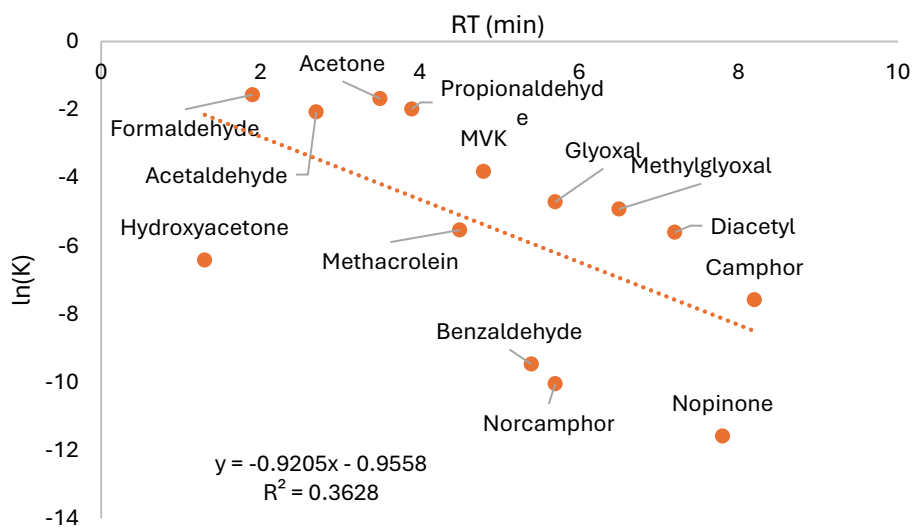

Figure S7. Scatterplot of  $\ln(K)$  at  $-20\text{ }^{\circ}\text{C}$  versus the HPLC Retention Time (RT).

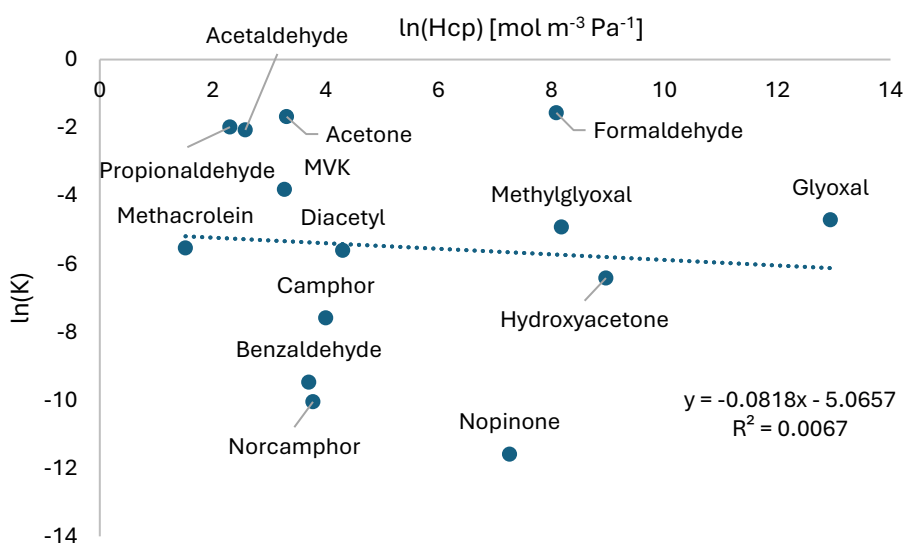

Figure S8. Scatterplot of  $\ln(K)$  at -20 °C versus the natural log of Henry solubility.

## References

- Fries, E., Starokozhev, E., Haunold, W., Jaeschke, W., Mitra, S. K., Borrmann, S., and Schmidt, M. U.: Laboratory studies on the uptake of aromatic hydrocarbons by ice crystals during vapor depositional crystal growth, *Atmos Environ*, 41, 6156–6166, <https://doi.org/10.1016/j.atmosenv.2007.04.028>, 2007.
- Griessen, R. and Dam, B.: Simple Accurate Verification of Enthalpy-Entropy Compensation and Isoequilibrium Relationship, *ChemPhysChem*, 22, 1774–1784, <https://doi.org/10.1002/CPHC.202100431>, 2021.
- Griessen, R., Boelsma, C., Schreuders, H., Broedersz, C. P., Gremaud, R., and Dam, B.: Single Quality Factor for Enthalpy-Entropy Compensation, Isoequilibrium and Isokinetic Relationships, *ChemPhysChem*, 21, 1632–1643, <https://doi.org/10.1002/CPHC.202000390>, 2020.
- Grunwald, E. and Steel, C.: Solvent Reorganization and Thermodynamic Enthalpy-Entropy Compensation, *J. Am. Chem. Soc.*, 5687–5692 pp., 1995.
- Liu, L. and Guo, Q. X.: Isokinetic relationship, isoequilibrium relationship, and enthalpy-entropy compensation, <https://doi.org/10.1021/cr990416z>, March 2001.
- Pan, A., Biswas, T., Rakshit, A. K., and Moulik, S. P.: Enthalpy-Entropy Compensation (EEC) Effect: A Revisit, *Journal of Physical Chemistry B*, 119, 15876–15884, <https://doi.org/10.1021/acs.jpcc.5b09925>, 2015.
- Ryde, U.: A fundamental view of enthalpy-entropy compensation, *Medchemcomm*, 5, 1324–1336, <https://doi.org/10.1039/c4md00057a>, 2014.

Sharp, K.: Entropy—enthalpy compensation: Fact or artifact?, *Protein Science*, 10, 661–667, <https://doi.org/10.1110/ps.37801>, 2001.

Starikov, E. B. and Nordén, B.: Enthalpy-entropy compensation: A phantom or something useful?, *Journal of Physical Chemistry B*, 111, 14431–14435, <https://doi.org/10.1021/JP075784I/ASSET/IMAGES/LARGE/JP075784IF00001.JPEG>, 2007.
